# Supplementary material for: Electrochemical biosensor with graphene oxide nanoparticles and polypyrrole interface for the detection of bilirubin
Source: Royal Society of Chemistry journal article supplement (doi:10.1039/c6ra15671a), 2016-01-01
Supplement: c6ra15671a1.pdf [file c6ra15671a1.pdf]

**Supplementary Table 1.** Comparison of the current response at different concentrations of nanoparticles (GONP).

| <b>Solution<br/>NaClO<sub>4</sub> (100 mM)<br/>+ Pyrrole (30 mM)</b> | <b>GONPs (Concentration in<br/>mg mL<sup>-1</sup>)</b> | <b>Current (mA)</b> |
|----------------------------------------------------------------------|--------------------------------------------------------|---------------------|
| NaClO <sub>4</sub> +Pyrrole                                          | 0.1                                                    | 0.15                |
| NaClO <sub>4</sub> +Pyrrole                                          | 0.5                                                    | 0.19                |
| NaClO <sub>4</sub> +Pyrrole                                          | 1.0                                                    | 0.23                |
| NaClO <sub>4</sub> +Pyrrole                                          | 2.5                                                    | 0.27                |
| NaClO <sub>4</sub> +Pyrrole                                          | 5.0                                                    | 0.32                |
| NaClO <sub>4</sub> +Pyrrole                                          | 10.0                                                   | 0.33                |

**Supplementary Table 2.** Serum bilirubin levels in apparently healthy persons and jaundice patients, as measured by bilirubin biosensor based on BOx/GONP@PPy/FTO electrode.

| <b>Sex</b> | <b>Age<br/>(Years)</b> | <b>Healthy<br/>persons<br/>(<math>\mu\text{M}</math>)</b> | <b>Sex</b> | <b>Age<br/>(Years)</b> | <b>Jaundice<br/>patient<br/>(<math>\mu\text{M}</math>)</b> |
|------------|------------------------|-----------------------------------------------------------|------------|------------------------|------------------------------------------------------------|
| M          | 30                     | 09 $\pm$ 0.04                                             | F          | 35                     | 23 $\pm$ 0.02                                              |
| M          | 26                     | 11 $\pm$ 0.06                                             | F          | 56                     | 21 $\pm$ 0.03                                              |
| F          | 54                     | 13 $\pm$ 0.01                                             | M          | 65                     | 30 $\pm$ 0.01                                              |
| M          | 80                     | 14 $\pm$ 0.05                                             | F          | 41                     | 23 $\pm$ 0.02                                              |
| F          | 45                     | 08 $\pm$ 0.03                                             | M          | 53                     | 26 $\pm$ 0.03                                              |
| F          | 50                     | 12 $\pm$ 0.01                                             | M          | 49                     | 31 $\pm$ 0.02                                              |
| M          | 46                     | 14 $\pm$ 0.05                                             | M          | 63                     | 30 $\pm$ 0.03                                              |
| F          | 37                     | 16 $\pm$ 0.02                                             | F          | 39                     | 39 $\pm$ 0.01                                              |
| F          | 18                     | 06 $\pm$ 0.07                                             | F          | 48                     | 41 $\pm$ 0.03                                              |
| M          | 26                     | 05 $\pm$ 0.05                                             | F          | 39                     | 39 $\pm$ 0.02                                              |
| F          | 15                     | 0.1 $\pm$ 0.03                                            | M          | 43                     | 39 $\pm$ 0.02                                              |
| F          | 60                     | 13 $\pm$ 0.01                                             | M          | 52                     | 44 $\pm$ 0.03                                              |
| M          | 52                     | 04 $\pm$ 0.04                                             | F          | 48                     | 40 $\pm$ 0.04                                              |
| M          | 45                     | 08 $\pm$ 0.02                                             | M          | 42                     | 38 $\pm$ 0.03                                              |
| F          | 55                     | 14 $\pm$ 0.04                                             | M          | 36                     | 44 $\pm$ 0.02                                              |
| M          | 20                     | 0.2 $\pm$ 0.03                                            | M          | 33                     | 49 $\pm$ 0.03                                              |
| M          | 26                     | 08 $\pm$ 0.01                                             | F          | 47                     | 48 $\pm$ 0.01                                              |
| F          | 50                     | 07 $\pm$ 0.04                                             | M          | 49                     | 60 $\pm$ 0.03                                              |
| M          | 60                     | 05 $\pm$ 0.04                                             | F          | 42                     | 55 $\pm$ 0.02                                              |
| F          | 23                     | 11 $\pm$ 0.02                                             | F          | 28                     | 51 $\pm$ 0.03                                              |
| M          | 55                     | 05 $\pm$ 0.06                                             | F          | 32                     | 55 $\pm$ 0.02                                              |
| M          | 55                     | 09 $\pm$ 0.02                                             | M          | 45                     | 59 $\pm$ 0.05                                              |
| F          | 55                     | 07 $\pm$ 0.03                                             | F          | 44                     | 57 $\pm$ 0.03                                              |
| F          | 19                     | 0.2 $\pm$ 0.02                                            | F          | 20                     | 52 $\pm$ 0.01                                              |
| M          | 20                     | 01 $\pm$ 0.04                                             | M          | 46                     | 61 $\pm$ 0.03                                              |
| M          | 26                     | 02 $\pm$ 0.06                                             | F          | 36                     | 61 $\pm$ 0.05                                              |

p < 0.05

**Supplementary Table 3:** A comparison table of analytical properties of bilirubin biosensors.

| Type of electrochemical sensor | Sensing interface modified electrodes                                 | Detection limit ( $\mu\text{M}$ ) | Linear range of detection ( $\mu\text{M}$ ) | Response (s) | Storage stability (months) | Reference |
|--------------------------------|-----------------------------------------------------------------------|-----------------------------------|---------------------------------------------|--------------|----------------------------|-----------|
| Amperometric                   | Zirconia coated silica nanoparticles/<br>Au electrode                 | 0.02                              | 0.02-250                                    | 2            | 4                          | [17]      |
| Amperometric                   | Polypyrrole nanoparticles (PPyNPs) and polyaniline nanocomposite film | 0.01                              | 0.01 to 320                                 | 2            | 2                          | [46]      |
| Piezoelectric                  | Titania film                                                          | 0.05                              | 0.1-50                                      | 1800         | 3                          | [13]      |
| Electrochemical                | Gold nanoparticles and multiwall carbon nanotubes                     | 1.0                               | 1 to 100                                    | 5            | 2                          | [44]      |
| Amperometric                   | Polyethyleneimine (PEI) film                                          | 0.04                              | 0.1 to 50                                   | 5            | 2                          | [16]      |
| Amperometric                   | GONP@PPy/FTO electrode                                                | 0.01                              | 0.01 to 500                                 | 2            | 5                          | Present   |
